# Supplementary material for: Hypoxic gene expression in chronic hepatitis B virus infected patients is not observed in state-of-the-art in vitro and mouse infection models
Source: PubMed Central journal article supplement (PMC7445281; doi:10.1038/s41598-020-70865-7), 2020-08-24
Supplement: 41598_2020_70865_MOESM1_ESM.pdf [file 41598_2020_70865_MOESM1_ESM.pdf]

**Hypoxic gene expression in chronic hepatitis B virus infected patients is not observed in state-of-art  
*in vitro* and mouse infection models.**

PJ Liu<sup>1</sup>, JM Harris<sup>1\*</sup>, E Marchi<sup>2</sup>, V D'Arienzo<sup>1</sup>, T Michler<sup>3</sup>, PAC Wing<sup>1</sup>, A Magri<sup>1</sup>,  
AM Ortega-Prieto<sup>4</sup>, M van de Klundert<sup>3</sup>, J Wettengel<sup>3</sup>, D Durantel<sup>5</sup>, M Dorner<sup>4†</sup>,  
P. Klenerman<sup>2</sup>, U Protzer<sup>3</sup>, ES Giotis<sup>4,6</sup> and JA McKeating<sup>1\*\*</sup>

1. Nuffield Department of Medicine Research Building, University of Oxford, Oxford, OX3 7LF. UK.

2. Medawar Building, University of Oxford, South Parks Road, Oxford OX1 3SY. UK.

3. Institute of Virology, Technical University of Munich/Helmholtz Zentrum München, Trogerstrasse 30, 81675,  
Munich, Germany.

4. Section of Molecular Virology, Department of Infectious Diseases, Imperial College London, London, W2 1PG, UK.

5. Cancer Research Center of Lyon (CRCL), INSERM U1052, and University of Lyon (UCBL1), Lyon, France.

6. School of Life Sciences, University of Essex, Colchester, C04 3SQ, UK

*\* Shared first authorship*

*\*\* Corresponding author: [jane.mckeating@ndm.ox.ac.uk](mailto:jane.mckeating@ndm.ox.ac.uk)*

*†deceased co-author*

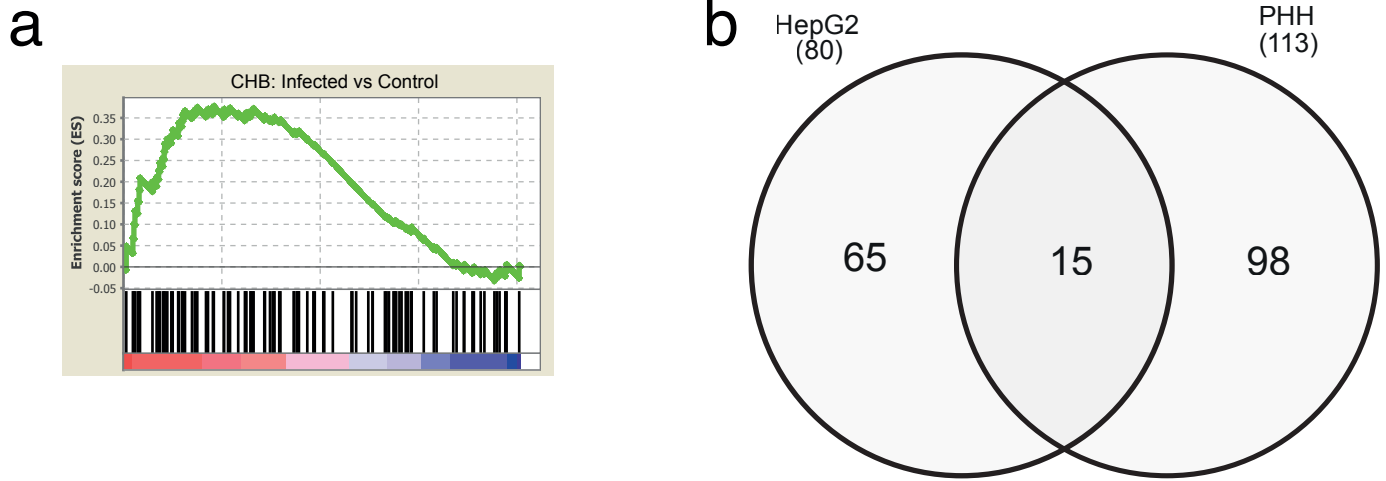

**Supplementary figure 1.** Increased primary human hepatocyte hypoxic gene expression in CHB. GSEA shows an enrichment of primary human hepatocyte (PHH) derived hypoxic genes in CHB cohort vs healthy controls (FDR=0.351); GSEA was performed using GSEA\_4.0.3 (a). Differential gene expression in HepG2 cells (0.5% oxygen for 16h) and PHHs (1% oxygen for 4h)72, using a cut-off of at least 2 fold change, with an FDR of 0.05, showed 80 differentially expressed genes in HepG2 cells and 113 in PHHs, with 15 common overlapping genes (b).

HBx

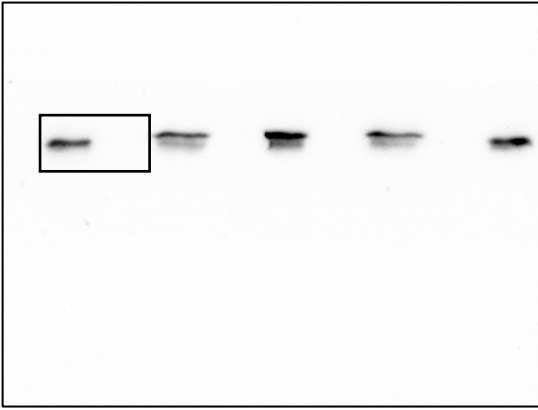

Smc6

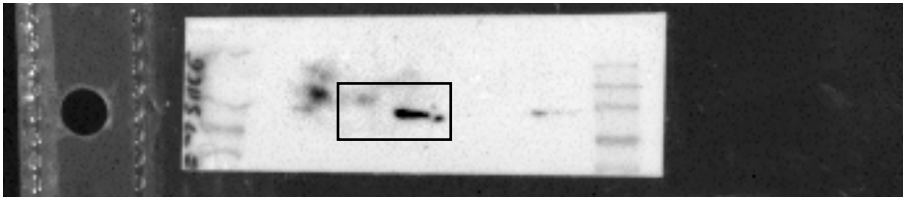

$\beta$ -actin

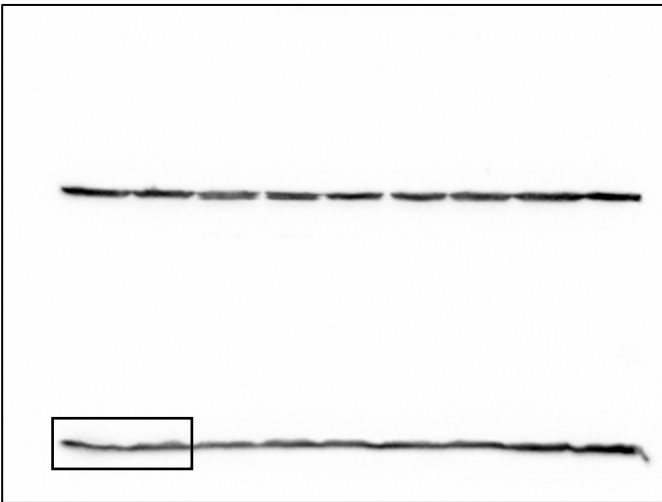

**Supplementary figure 2.** Uncropped western blots shown for Fig.2a with relevant samples highlighted. HBx and  $\beta$ -actin images originate from the same PVDF membrane cut at the 70kDa molecular marker position. Smc6 image was developed on a separate PVDF membrane.

# HepaRG-HBx<sub>WT</sub>

HIF-1 $\alpha$

HIF-2 $\alpha$

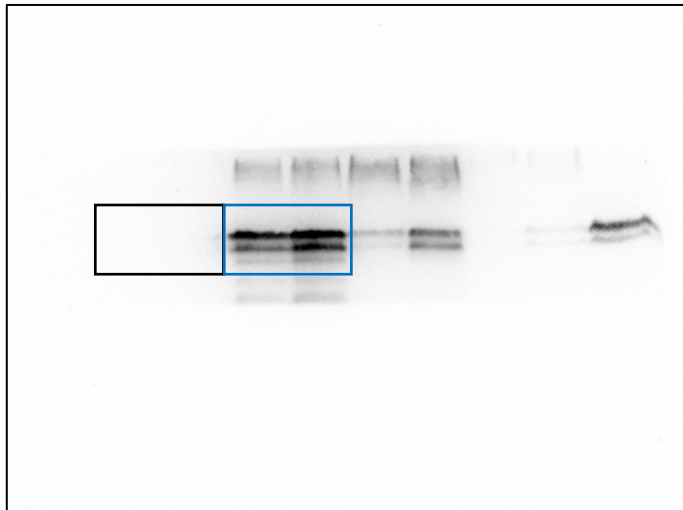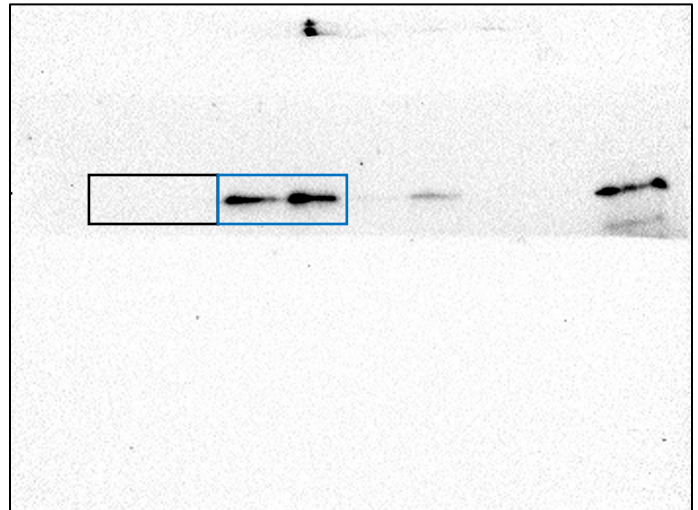

CAIX 20%

CAIX 1%

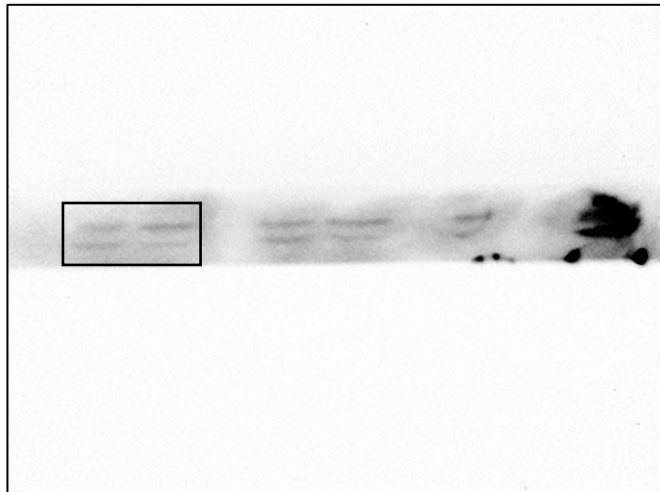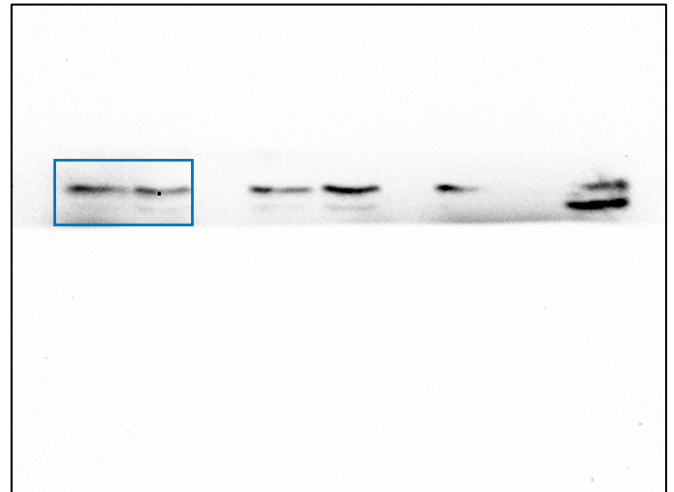

$\beta$ -actin

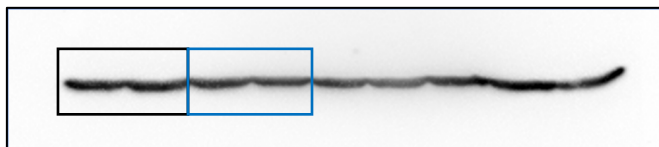

**Supplementary figure 3.** Uncropped western blots shown for Fig.2c (left panel) HepaRG-HBx<sub>WT</sub> with relevant samples highlighted (black for 20% and blue for 1% oxygen). HIF-1 $\alpha$ , HIF-2 $\alpha$  and  $\beta$ -actin images were from the same PVDF membrane cut at the 70kDa molecular marker position. CAIX images were developed on separate PVDF membranes.

# HepaRG-HBx<sub>STOP</sub>

HIF-1 $\alpha$

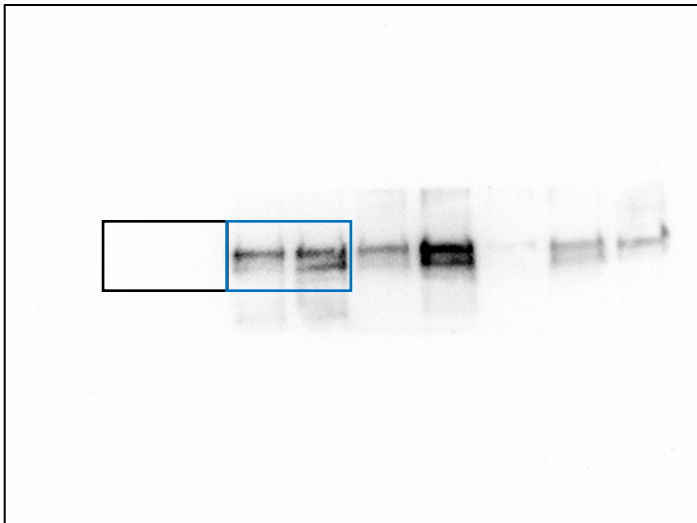

HIF-2 $\alpha$

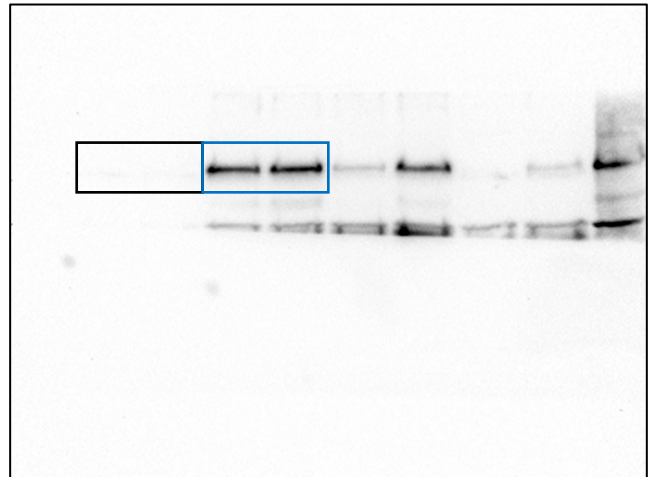

CAIX 20%

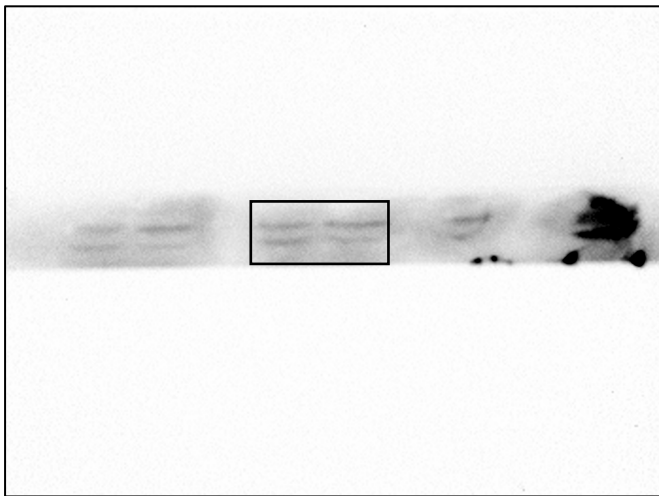

CAIX 1%

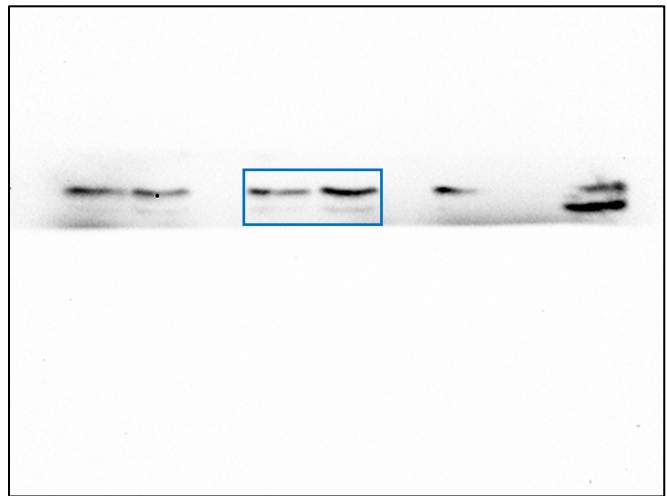

$\beta$ -actin

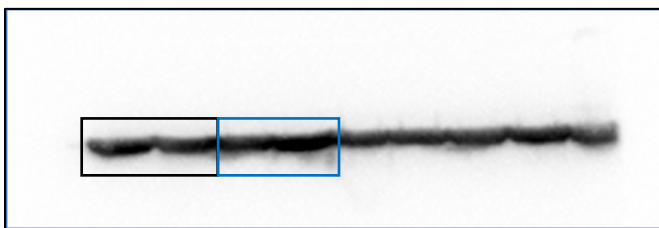

**Supplementary figure 4.** Uncropped western blots shown for Fig.2c (right panel) HepaRG-HBx<sub>STOP</sub> with relevant samples highlighted (black for 20% and blue for 1% oxygen). HIF-1 $\alpha$ , HIF-2 $\alpha$  and  $\beta$ -actin images were from the same PVDF membrane cut at the 70kDa molecular marker position. CAIX images were developed on separate PVDF membranes.

HIF-1 $\alpha$

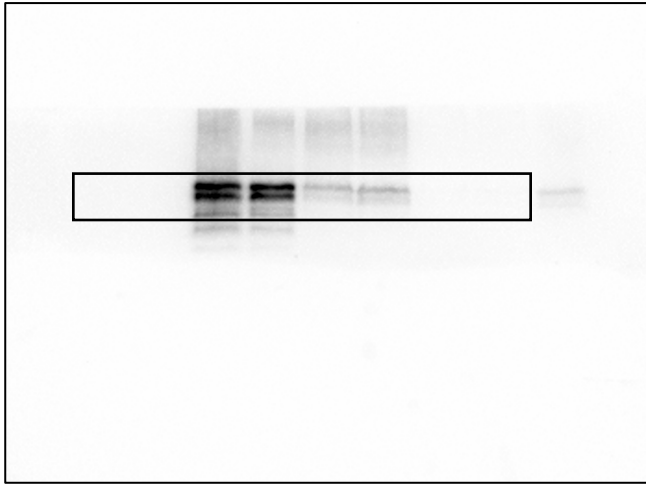

HIF-2 $\alpha$

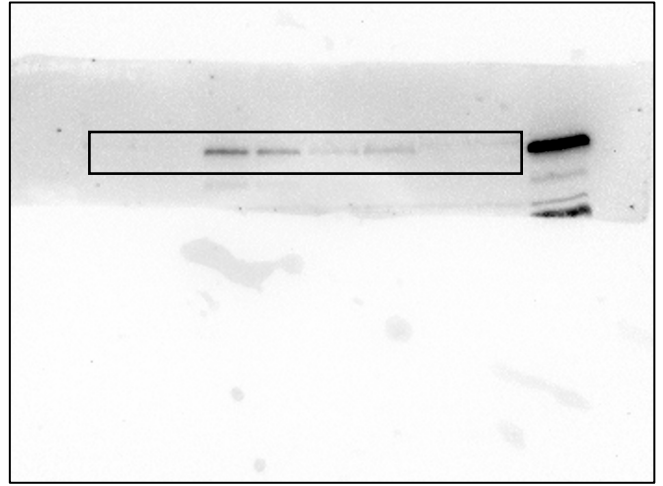

$\beta$ -actin

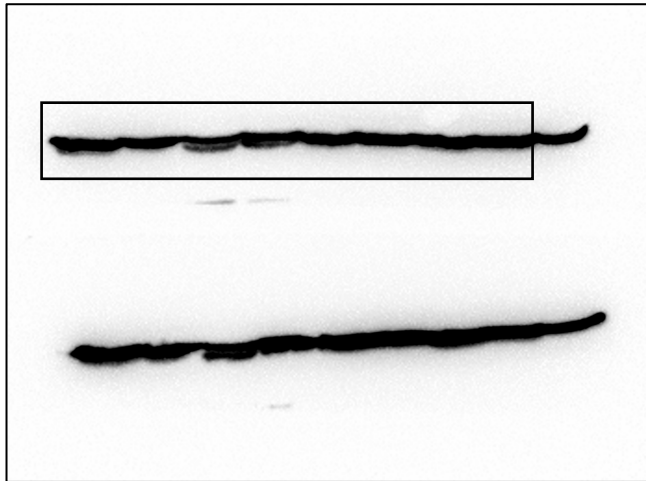

**Supplementary figure 5.** Uncropped western blots shown for Fig.2e with relevant samples highlighted. HIF-1 $\alpha$ , HIF-2 $\alpha$  and  $\beta$ -actin images were from the same PVDF membrane cut at the 70kDa molecular marker position.

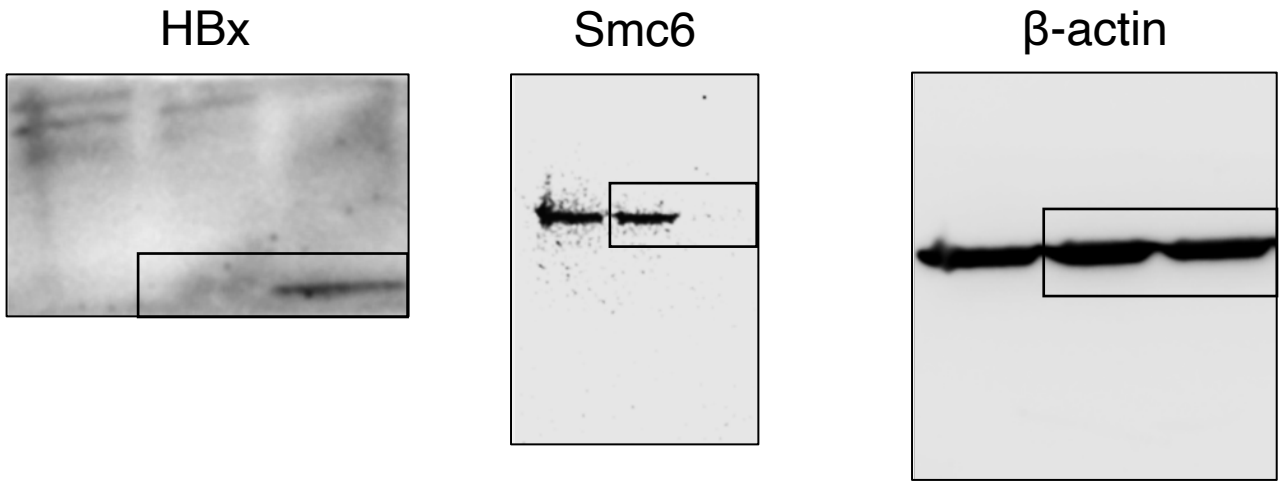

**Supplementary figure 6.** Uncropped western blots shown for Fig.3a with relevant samples highlighted. Smc6 and  $\beta$ -actin images were from the same PVDF membrane cut at the 70kDa molecular marker position. HBx image was developed on a separate membrane.

# Ad-HBx

HBx

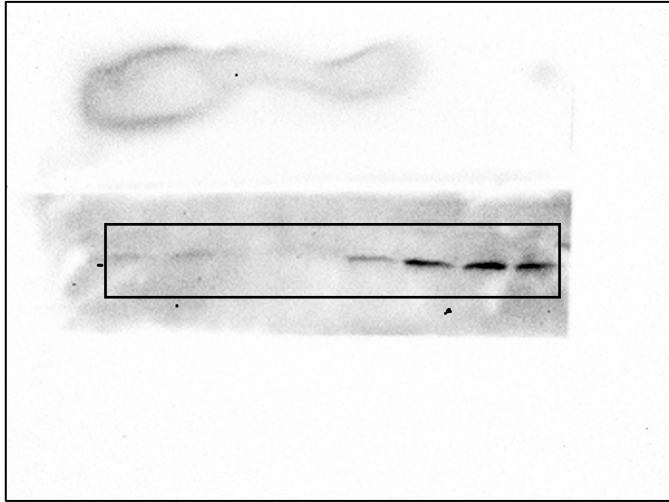

HIF-1 $\alpha$

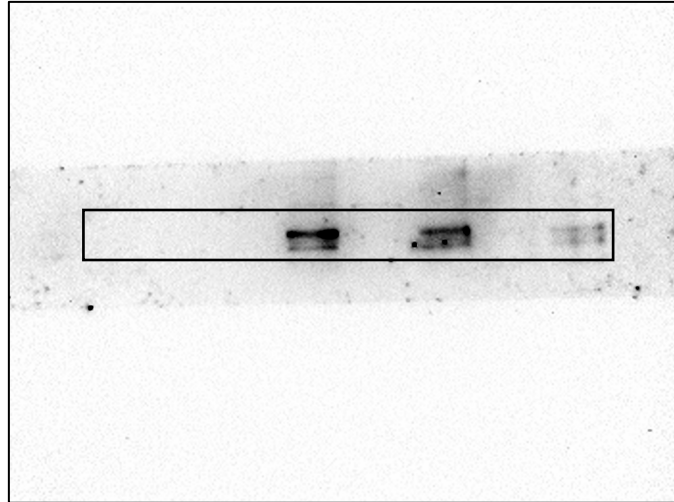

$\beta$ -actin

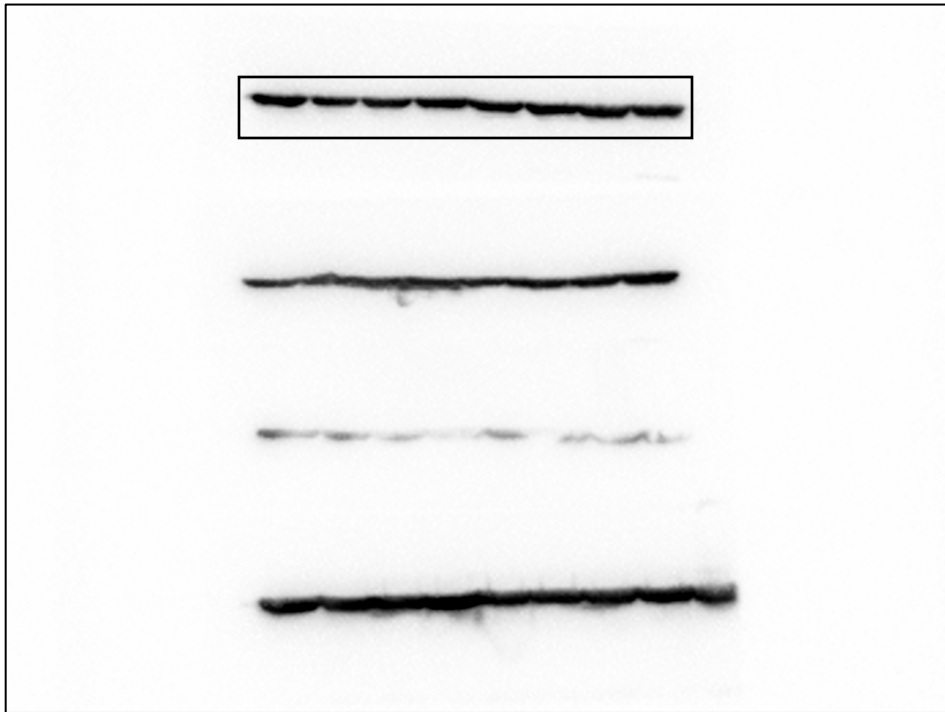

**Supplementary figure 7.** Uncropped western blots shown for Fig.3b (upper panel) Ad-HBx with relevant samples highlighted. HIF-1 $\alpha$  and  $\beta$ -actin images were from the same PVDF membrane cut at the 70kDa molecular marker position. HBx image was developed on a separate membrane



# Ad-OVA

HIF-1 $\alpha$

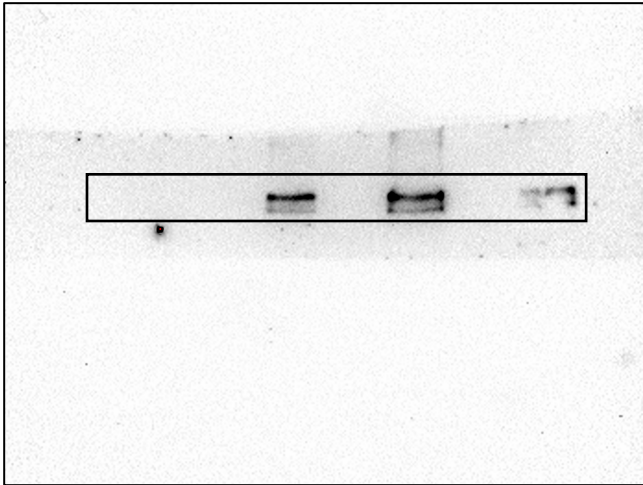

$\beta$ -actin

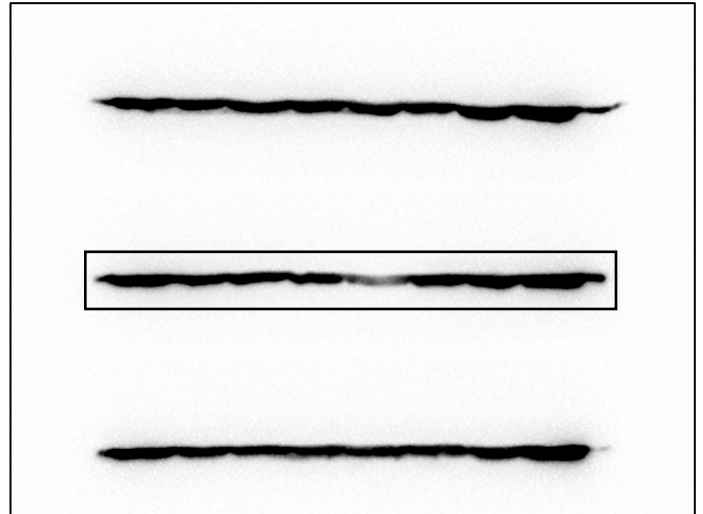

**Supplementary figure 8.** Uncropped western blots shown for Fig.3b (lower panel) Ad-OVA with relevant samples highlighted. HIF-1 $\alpha$  and  $\beta$ -actin images were from the same PVDF membrane cut at the 70kDa molecular marker position.

HIF-1 $\alpha$

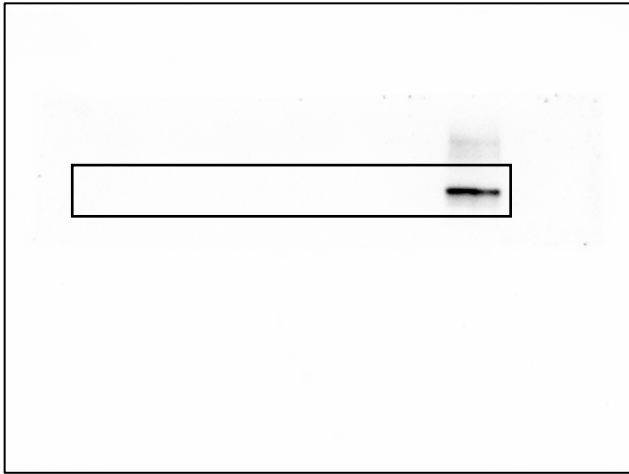

HIF-2 $\alpha$

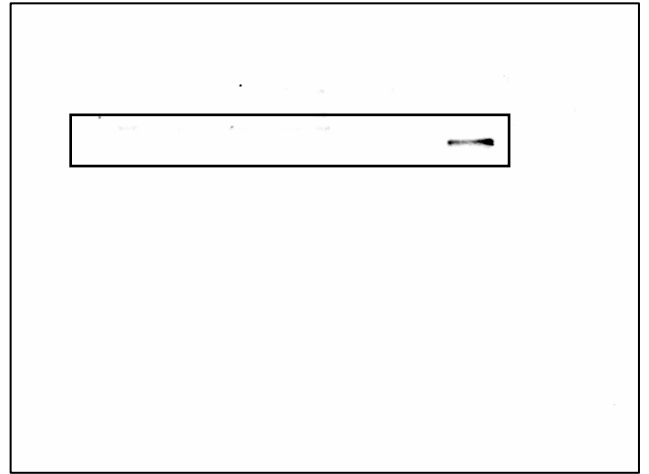

CAIX

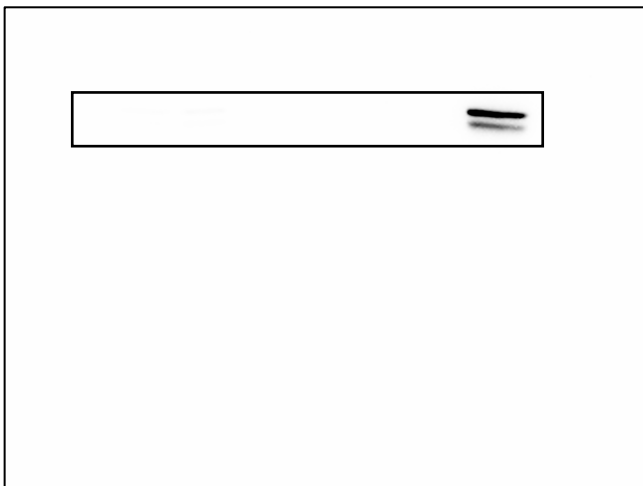

$\beta$ -actin

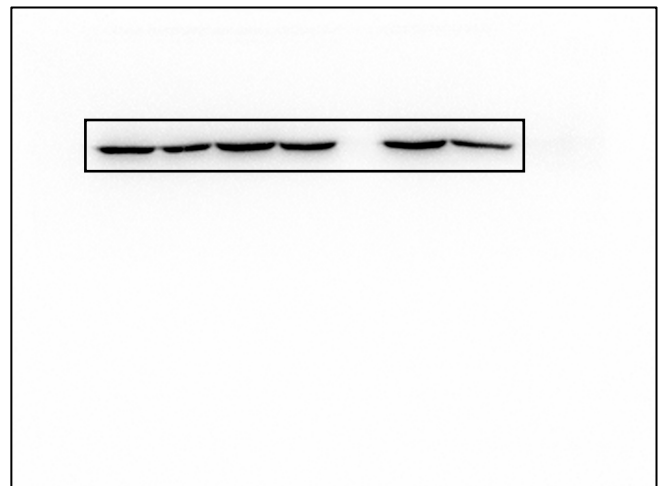

**Supplementary figure 9.** Uncropped western blots shown for Fig.5a with relevant samples highlighted. HIF-1 $\alpha$ / HIF-2 $\alpha$  and CAIX/ $\beta$ -actin images were from the same PVDF membrane cut at the 70kDa molecular marker position.

| HYPOXIA_UPREGULATED_GENE_SIGNATURES |                                       |      |         |                                    |
|-------------------------------------|---------------------------------------|------|---------|------------------------------------|
| RANK                                | SIGNATURE                             | SIZE | OVERLAP | ORIGIN                             |
| 1                                   | CERVERA SDHB TARGETS 2                | 111  | 1       | Hep3B and HeLA Cells               |
| 2                                   | CERVERA SDHB TARGETS 1 UP             | 113  | 2       | Hep3B and HeLA Cells               |
| 3                                   | HARRIS HYPOXIA                        | 80   | 12      | Pan-cancer                         |
| 4                                   | KRIEG HYPOXIA VIA KDM3A               | 50   | 2       | Renal and colon carcinoma          |
| 5                                   | KENNY CTNNB1 TARGETS UP               | 48   | 1       | Breast and colon cancer            |
| 6                                   | GROSS HYPOXIA VIA ELK3 UP             | 197  | 1       | Skin endothelium                   |
| 7                                   | ELVIDGE HYPOXIA BY DMOG UP            | 130  | 26      | Breast cancer cell line MCF7       |
| 8                                   | GROSS ELK3 TARGETS UP                 | 27   | 0       | Skin endothelium                   |
| 9                                   | ELVIDGE HYPOXIA UP                    | 164  | 29      | Breast cancer cell line MCF7       |
| 10                                  | HU ANGIOGENESIS UP                    | 20   | 0       | nSCLC                              |
| 11                                  | GROSS HYPOXIA VIA ELK3 ONLY UP        | 31   | 2       | Skin endothelium                   |
| 12                                  | WINTER HYPOXIA METAGENE               | 232  | 25      | Head and neck cancers              |
| 13                                  | QI HYPOXIA TARGETS OF HIF1A AND FOXA2 | 30   | 3       | Adeno- and prostate carcinoma      |
| 14                                  | BIOCARTA P53 HYPOXIA PATHWAY          | 20   | 1       | Cardiovascular endothelium         |
| 15                                  | DER IFN ALPHA RESPONSE UP             | 70   | 1       | Fibrosarcoma                       |
| 16                                  | MANALO HYPOXIA UP                     | 201  | 23      | Pulmonary artery endothelium       |
| 17                                  | WEINMANN ADAPTATION TO HYPOXIA UP     | 25   | 0       | Hypoxia tolerant lung cancer cells |
| 18                                  | LEONARD HYPOXIA                       | 42   | 10      | Kidney tubule cells                |
| 19                                  | KIM HYPOXIA                           | 19   | 6       | Fibroblasts                        |

**Supplementary Table 1. Hypoxic gene signatures from MSigDB that are enriched (FDR<0.05) in CHB.** Gene signatures are ranked by NES. The table also shows the number of genes in each signature (Size); the number of genes in common with the HepG2 derived signature (Overlap); and the tissue or cell line from which this signature was derived (Origin).

## 80 Hypoxia signature genes

| Rank | Gene_Symbol | Gene_Description                                                                | Accession_Number(s)                                                                     |
|------|-------------|---------------------------------------------------------------------------------|-----------------------------------------------------------------------------------------|
| 1    | LOXL2       | Lysyl oxidase like 2                                                            | NM_002318                                                                               |
| 2    | SMIM3       | Small integral membrane protein 3                                               | NM_032947                                                                               |
| 3    | LOC154761   | Family with sequence similarity 115, member c pseudogene                        | NR_015421                                                                               |
| 4    | WDR54       | Wd repeat domain 54                                                             | NM_032118 /// XM_005264586 /// XM_006712111                                             |
| 5    | DOK3        | Docking protein 3                                                               | NM_001144875 /// NM_001144876 /// NM_001308235 /// NM_001308236 /// NM_024872 /// XM_00 |
| 6    | HCAR3       | Hydroxycarboxylic acid receptor 3                                               | NM_006018                                                                               |
| 7    | EHD2        | Eh domain containing 2                                                          | NM_014601                                                                               |
| 8    | TNS1        | Tensin 1                                                                        | NM_001308022 /// NM_001308023 /// NM_022648 /// XM_011511711 /// XM_011511712 /// XM_01 |
| 9    | HK1         | Hexokinase 1                                                                    | NM_000188 /// NM_033496 /// NM_033497 /// NM_033498 /// NM_033500 /// XM_005269735 ///  |
| 10   | SLC2A3      | Solute carrier family 2 member 3                                                | NM_006931                                                                               |
| 11   | GY51        | Glycogen synthase 1                                                             | NM_001161587 /// NM_002103 /// NR_027763                                                |
| 12   | PLAC8       | Placenta specific 8                                                             | NM_001130715 /// NM_001130716 /// NM_016619                                             |
| 13   | IGFBP1      | Insulin like growth factor binding protein 1                                    | NM_000596 /// NM_001013029                                                              |
| 14   | FXYD1       | Fxyd domain containing ion transport regulator 1                                | NM_001278717 /// NM_001278718 /// NM_005031 /// NM_021902                               |
| 15   | LSP1        | Lymphocyte-specific protein 1                                                   | NM_001013253 /// NM_001013254 /// NM_001013255 /// NM_001242932 /// NM_001289005 /// NM |
| 16   | SLC6A8      | Solute carrier family 6 member 8                                                | NM_001142805 /// NM_001142806 /// NM_005629                                             |
| 17   | TFF1        | Trefoil factor 1                                                                | NM_003225                                                                               |
| 18   | TUBB1       | Tubulin beta 1 class vi                                                         | NM_030773                                                                               |
| 19   | RIMKLA      | Ribosomal modification protein rimk like family member a                        | NM_173642 /// XM_006710585                                                              |
| 20   | PFKFB3      | 6-phosphofructo-2-kinase/fructose-2,6-biphosphatase 3                           | NM_001145443 /// NM_001282630 /// NM_001314063 /// NM_004566 /// XM_005252463 /// XM_00 |
| 21   | CKB         | Creatine kinase b                                                               | NM_001823                                                                               |
| 22   | RASSF5      | Ras association domain family member 5                                          | NM_031437 /// NM_182663 /// NM_182664 /// NM_182665                                     |
| 23   | SLC51A      | Solute carrier family 51 alpha subunit                                          | NM_152672                                                                               |
| 24   | SPAG4       | Sperm associated antigen 4                                                      | NM_003116 /// XM_005260519 /// XM_005260520 /// XM_011529009 /// XM_011529010 /// XM_01 |
| 25   | HAVCR1      | Hepatitis a virus cellular receptor 1                                           | NM_001099414 /// NM_001173393 /// NM_001308156 /// NM_012206 /// XM_006714840 /// XM_01 |
| 26   | ANGPTL4     | Angiopoietin like 4                                                             | NM_001039667 /// NM_016109 /// NM_139314 /// NR_104213 /// XM_005272484 /// XM_00527248 |
| 27   | LOX         | Lysyl oxidase                                                                   | NM_001178102 /// NM_001317073 /// NM_002317                                             |
| 28   | CA9         | Carbonic anhydrase 9                                                            | NM_001216 /// XM_006716869 /// XM_006716870 /// XR_428428                               |
| 29   | IGLON5      | Igln family member 5                                                            | NM_001101372                                                                            |
| 30   | PFKFB4      | 6-phosphofructo-2-kinase/fructose-2,6-biphosphatase 4                           | NM_004567 /// XM_005265230 /// XM_005265231 /// XM_011533829 /// XM_011533830 /// XM_01 |
| 31   | PLEKHA2     | Pleckstrin homology domain containing a2                                        | NM_021623 /// XM_011544605 /// XM_011544606 /// XM_011544607 /// XM_011544608           |
| 32   | LOXL3       | Lysyl oxidase like 3                                                            | NM_001289164 /// NM_001289165 /// NM_032603 /// XM_011533134                            |
| 33   | CHST15      | Carbohydrate (n-acetylgalactosamine 4-sulfate 6-o) sulfotransferase 15          | NM_001270764 /// NM_001270765 /// NM_014863 /// NM_015892 /// XM_005269891 /// XM_00526 |
| 34   | TMCC1       | Transmembrane and coiled-coil domain family 1                                   | NM_001017395 /// NM_001128224 /// NM_015008 /// NR_033361 /// XM_006713542 /// XM_00671 |
| 35   | BHLHE40     | Basic helix-loop-helix family member e40                                        | NM_003670                                                                               |
| 36   | EGLF7       | Egf like domain multiple 7                                                      | NM_016215 /// NM_201446 /// NR_045110 /// NR_045111 /// NR_046367 /// XM_006717141 ///  |
| 37   | EGLN3       | Egl-9 family hypoxia inducible factor 3                                         | NM_001308103 /// NM_022073 /// XM_006720015                                             |
| 38   | KCTD11      | Potassium channel tetramerization domain containing 11                          | NM_001002914                                                                            |
| 39   | FGF11       | Fibroblast growth factor 11                                                     | NM_001303460 /// NM_004112 /// NR_130156                                                |
| 40   | TMEM45A     | Transmembrane protein 45a                                                       | NM_018004 /// XM_005247569                                                              |
| 41   | ISM2        | Isthmin 2                                                                       | NM_182509 /// NM_199265 /// NM_199296 /// XM_011536489                                  |
| 42   | NDRG1       | N-myc downstream regulated 1                                                    | NM_001135242 /// NM_001258432 /// NM_001258433 /// NM_006096 /// XM_011516791 /// XM_01 |
| 43   | SERPINE1    | Serpin family e member 1                                                        | NM_000602 /// NM_001165413                                                              |
| 44   | ESPN        | Espin                                                                           | NM_031475 /// XM_005263501 /// XM_011542231 /// XM_011542232 /// XM_011542233 /// XM_01 |
| 45   | ADM         | Adrenomedullin                                                                  | NM_001124                                                                               |
| 46   | RNASET2     | Ribonuclease t2                                                                 | NM_003730                                                                               |
| 47   | FAM110C     | Family with sequence similarity 110 member c                                    | NM_001077710 /// XM_011510372 /// XM_011510373 /// XM_011510374                         |
| 48   | IGFBP3      | Insulin like growth factor binding protein 3                                    | NM_000598 /// NM_001013398                                                              |
| 49   | PKD1        | Pyruvate dehydrogenase kinase 1                                                 | NM_001278549 /// NM_002610 /// NR_103729 /// NR_103731 /// XM_006712594 /// XM_00671259 |
| 50   | PDGFB       | Platelet derived growth factor subunit b                                        | NM_002608 /// NM_033016                                                                 |
| 51   | UNC93A      | Protein unc-93 homolog a                                                        | NM_001143947 /// NM_018974 /// XM_011535905 /// XM_011535906 /// XM_011535907 /// XM_01 |
| 52   | PPP2R2C     | Protein phosphatase 2 regulatory subunit bgamma                                 | NM_001206994 /// NM_001206995 /// NM_001206996 /// NM_020416 /// NM_181876 /// XM_00524 |
| 53   | FAM13A      | Family with sequence similarity 13 member a                                     | NM_001015045 /// NM_001265578 /// NM_001265579 /// NM_001265580 /// NM_014883 /// XM_00 |
| 54   | PLIN2       | Perilipin 2                                                                     | NM_001122 /// NR_038064 /// XM_006716719                                                |
| 55   | GBE1        | Glycogen branching enzyme                                                       | NM_000158                                                                               |
| 56   | LCN15       | Lipocalin 15                                                                    | NM_203347 /// XM_006717105 /// XM_011518672                                             |
| 57   | ZNF395      | Zinc finger protein 395                                                         | NM_018660                                                                               |
| 58   | RAB42       | Ras-related protein rab-42                                                      | NM_001193532 /// NM_152304                                                              |
| 59   | PGK1        | Phosphoglycerate kinase 1                                                       | NM_000291                                                                               |
| 60   | PPP1R3C     | Protein phosphatase 2 regulatory subunit 3c                                     | NM_005398                                                                               |
| 61   | BNIP3L      | Bcl2/adenovirus e1b 19kda protein-interacting protein 3-like                    | NM_004331 /// XM_005273617 /// XM_011544630                                             |
| 62   | ANKRD37     | Ankyrin repeat domain 37                                                        | NM_181726 /// XM_005262981                                                              |
| 63   | ANKZF1      | Ankyrin repeat and zinc finger domain containing 1                              | NM_001042410 /// NM_001282792 /// NM_018089 /// XM_005246663 /// XM_011511392 /// XR_42 |
| 64   | APOL1       | Apolipoprotein 1                                                                | NM_001136540 /// NM_001136541 /// NM_003661 /// NM_145343 /// NM_145344 /// XM_00526179 |
| 65   | DDIT4       | Dna damage inducible transcript 4                                               | NM_019058                                                                               |
| 66   | PNPLA7      | Patatin-like phospholipase domain-containing protein 7                          | NM_001098537 /// NM_152286 /// XM_006717102 /// XM_006717104 /// XM_011518664 /// XR_92 |
| 67   | BNIP3       | Bcl2 interacting protein 3                                                      | NM_004052                                                                               |
| 68   | RORA        | Rar related orphan receptor a                                                   | NM_002943 /// NM_134260 /// NM_134261 /// NM_134262 /// XM_005254584 /// XM_011521873 / |
| 69   | NDUFA4L2    | Ndufa4 mitochondrial complex associated like 2                                  | NM_020142 /// XM_005269033 /// XM_011538573                                             |
| 70   | PIGZ        | Phosphatidylinositol glycan anchor biosynthesis class z                         | NM_025163 /// XM_006713758 /// XM_011513190 /// XM_011513191 /// XM_011513192           |
| 71   | ABCA7       | Atp binding cassette transporter a7                                             | NM_019112 /// NM_033308 /// XM_006722616 /// XM_006722617 /// XM_006722618 /// XM_01152 |
| 72   | HR          | Protein hairless                                                                | NM_005144 /// NM_018411 /// XM_005273569 /// XM_006716367                               |
| 73   | EPO         | Erythropoietin                                                                  | NM_000799                                                                               |
| 74   | TMEM145     | Transmembrane protein 145                                                       | NM_173633 /// XM_005258781 /// XM_011526791 /// XM_011526792                            |
| 75   | MIR210HG    | Mir210 host gene                                                                | NR_038262                                                                               |
| 76   | CITED2      | Cbp/p300 interacting transactivator with glu/asp rich carboxy-terminal domain 2 | NM_001168388 /// NM_001168389 /// NM_006079                                             |
| 77   | PLOD2       | Procollagen-lysine,2-oxoglutarate 5-dioxygenase 2                               | NM_000935 /// NM_182943 /// XM_005247535 /// XM_005247536                               |
| 78   | INH A       | Inhibin alpha                                                                   | NM_002191                                                                               |
| 79   | BIRC7       | Baculoviral iap repeat containing 7                                             | NM_022161 /// NM_139317                                                                 |
| 80   | ALDOC       | Aldolase, fructose-bisphosphate c                                               | NM_005165 /// XM_005257949 /// XM_011524556                                             |

**Supplementary Table 2. Hypoxia upregulated genes in HepG2 cells.**
